# Supplementary material for: Stage-Specific Value of Carbohydrate Antigen 19-9 and Carcinoembryonic Antigen Serum Levels on Survival and Recurrence in Pancreatic Cancer: A Single Center Study and Meta-Analysis
Source: PubMed Central journal article supplement (PMC7602123; doi:10.3390/cancers12102970), 2020-10-14
Supplement: cancers-12-02970-s001.pdf [file cancers-12-02970-s001.pdf]

Article

# Stage-Specific Value of Carbohydrate Antigen 19-9 and Carcinoembryonic Antigen Serum Levels on Survival and Recurrence in Pancreatic Cancer: A Single Center Study and Meta-Analysis

Labrinus van Manen, Jesse V. Groen, Hein Putter, Martin Pichler, Alexander L. Vahrmeijer, Bert A. Bonsing, and J. Sven D. Mieog

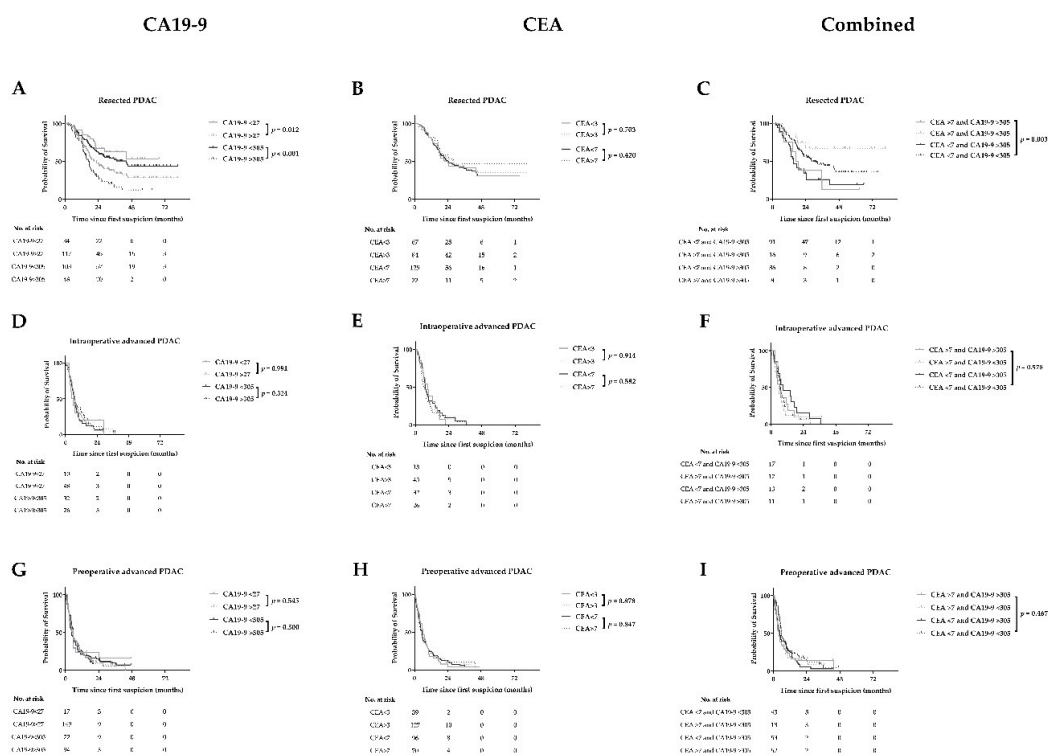

**Figure S1.** Survival curves for CA19-9 and CEA serum levels stratified by resected PDAC (A–C), intraoperative advanced PDAC (D–F) and preoperative advanced PDAC (G–I) patients.

**Table S1.** Multivariable cox regression analysis for overall survival including combined CA19-9 and CEA levels.

| Parameter                          | Entire Cohort (n = 375) |           |         | Resected Cohort (n = 151) |           |         | Advanced PDAC Cohort (n = 224) |           |         |
|------------------------------------|-------------------------|-----------|---------|---------------------------|-----------|---------|--------------------------------|-----------|---------|
|                                    | HR                      | 95% CI    | p-value | HR                        | 95% CI    | p-value | HR                             | 95% CI    | p-value |
| <b>Tumormarkers</b>                |                         |           |         |                           |           |         |                                |           |         |
| CA19-9 < 305 kU/L and CEA < 7 µg/L | 1.00                    | 1.00–1.00 | 1.000   | 1.00                      | 1.00–1.00 | 1.000   | 1.00                           | 1.00–1.00 | 1.000   |
| CA19-9 < 305 kU/L and CEA > 7 µg/L | 1.24                    | 0.72–2.12 | 0.439   | 0.40                      | 0.11–1.38 | 0.145   | 1.30                           | 0.76–2.21 | 0.337   |
| CA19-9 > 305 kU/L and CEA < 7 µg/L | 1.71                    | 1.21–2.42 | 0.003   | 2.23                      | 1.24–4.01 | 0.007   | 1.00                           | 0.65–1.54 | 0.992   |
| CA19-9 > 305 kU/L and CEA > 7 µg/L | 2.17                    | 1.46–3.23 | <0.001  | 2.74                      | 0.86–8.70 | 0.088   | 0.99                           | 0.62–1.58 | 0.967   |
| <b>Age (yr)</b>                    |                         |           |         |                           |           |         |                                |           |         |
| >65 yr                             | 1.28                    | 0.98–1.67 | 0.070   | 1.03                      | 0.65–1.64 | 0.889   | 1.02                           | 0.72–1.44 | 0.917   |
| <b>Sex, n (%)</b>                  |                         |           |         |                           |           |         |                                |           |         |
| Female                             | 0.84                    | 0.65–1.08 | 0.167   | 0.98                      | 0.62–1.57 | 0.943   | 0.65                           | 0.47–0.88 | 0.006   |
| <b>ASA score, n (%)</b>            |                         |           |         |                           |           |         |                                |           |         |
| I                                  | 1.00                    | 1.00–1.00 | 1.000   | 1.00                      | 1.00–1.00 | 1.000   | 1.00                           | 1.00–1.00 | 1.000   |
| II                                 | 1.13                    | 0.78–1.65 | 0.526   | 1.69                      | 0.73–3.91 | 0.224   | 1.61                           | 1.03–2.52 | 0.038   |
| III-IV                             | 1.75                    | 1.15–2.67 | 0.010   | 3.85                      | 1.53–9.69 | 0.004   | 2.23                           | 1.31–3.79 | 0.003   |
| <b>Bilirubin</b>                   |                         |           |         |                           |           |         |                                |           |         |
| >17 µmol/L                         | 0.78                    | 0.61–1.01 | 0.063   | 0.79                      | 0.48–1.30 | 0.351   | 1.09                           | 0.80–1.51 | 0.581   |
| <b>Tumor size</b>                  |                         |           |         |                           |           |         |                                |           |         |
| >20 mm                             | 2.36                    | 1.48–3.75 | <0.001  | 1.60                      | 0.82–3.13 | 0.170   | 2.73                           | 1.36–5.50 | 0.005   |

Abbreviations: CA19-9: carbohydrate antigen 19-9; CEA: carcinoembryonic antigen.

**Table S2.** Multivariable cox regression analysis for recurrence in resected PDAC cohort including combined CA19-9 and CEA levels.

| Parameter                          | General Recurrence ( <i>n</i> = 84) * |           |                 | Locoregional Recurrence ( <i>n</i> = 55) * |           |                 | Distant Recurrence ( <i>n</i> = 61) * |           |                 |
|------------------------------------|---------------------------------------|-----------|-----------------|--------------------------------------------|-----------|-----------------|---------------------------------------|-----------|-----------------|
|                                    | HR                                    | 95% CI    | <i>p</i> -value | HR                                         | 95% CI    | <i>p</i> -value | HR                                    | 95% CI    | <i>p</i> -value |
| Tumormarkers                       |                                       |           |                 |                                            |           |                 |                                       |           |                 |
| CA19-9 <305 kU/L and CEA <7 µg/L   | 1.00                                  | 1.00–1.00 | 1.000           | 1.00                                       | 1.00–1.00 | 1.000           | 1.00                                  | 1.00–1.00 | 1.000           |
| CA19-9 <305 kU/L and CEA >7 µg/L   | 0.62                                  | 0.23–1.70 | 0.354           | 0.66                                       | 0.17–2.60 | 0.551           | 0.65                                  | 0.21–2.00 | 0.449           |
| CA19-9 > 305 kU/L and CEA < 7 µg/L | 1.63                                  | 0.93–2.86 | 0.091           | 1.70                                       | 0.83–3.48 | 0.149           | 1.65                                  | 0.85–3.21 | 0.140           |
| CA19-9 >305 kU/L and CEA >7 µg/L   | 1.41                                  | 0.40–5.00 | 0.591           | 1.44                                       | 0.51–4.02 | 0.491           | 1.49                                  | 0.31–7.09 | 0.614           |
| Tumor size                         |                                       |           |                 |                                            |           |                 |                                       |           |                 |
| >20 mm                             | 1.97                                  | 1.03–3.76 | 0.041           | 1.79                                       | 0.83–3.83 | 0.136           | 1.77                                  | 0.84–3.74 | 0.135           |
| Perineural invasion                |                                       |           |                 |                                            |           |                 |                                       |           |                 |
| Present                            | 1.26                                  | 0.77–2.07 | 0.353           | 1.13                                       | 0.62–2.06 | 0.692           | 1.41                                  | 0.78–2.53 | 0.257           |
| Margin status                      |                                       |           |                 |                                            |           |                 |                                       |           |                 |
| R1                                 | 1.48                                  | 0.94–2.32 | 0.092           | 1.40                                       | 0.80–2.46 | 0.242           | 1.61                                  | 0.95–2.71 | 0.075           |
| Differentiation grade              |                                       |           |                 |                                            |           |                 |                                       |           |                 |
| Well                               | 1.00                                  | 1.00–1.00 | 1.000           | 1.00                                       | 1.00–1.00 | 1.000           | 1.00                                  | 1.00–1.00 | 1.000           |
| Moderate                           | 1.88                                  | 0.91–3.86 | 0.088           | 1.61                                       | 0.73–3.53 | 0.234           | 2.04                                  | 0.82–5.08 | 0.125           |
| Poorly                             | 1.66                                  | 0.51–5.41 | 0.109           | 1.06                                       | 0.46–2.44 | 0.895           | 2.18                                  | 0.88–5.39 | 0.091           |
| Undifferentiated or unknown        | 1.66                                  | 0.51–5.41 | 0.405           | 0.65                                       | 0.14–3.18 | 0.599           | 2.67                                  | 0.73–9.76 | 0.138           |

Abbreviations: PDAC: pancreatic ductal adenocarcinoma; HR: Hazard Ratio; CA19-9: carbohydrate antigen 19-9; CEA: carcinoembryonic antigen. \* Some patients had both locoregional recurrence and distant metastases.

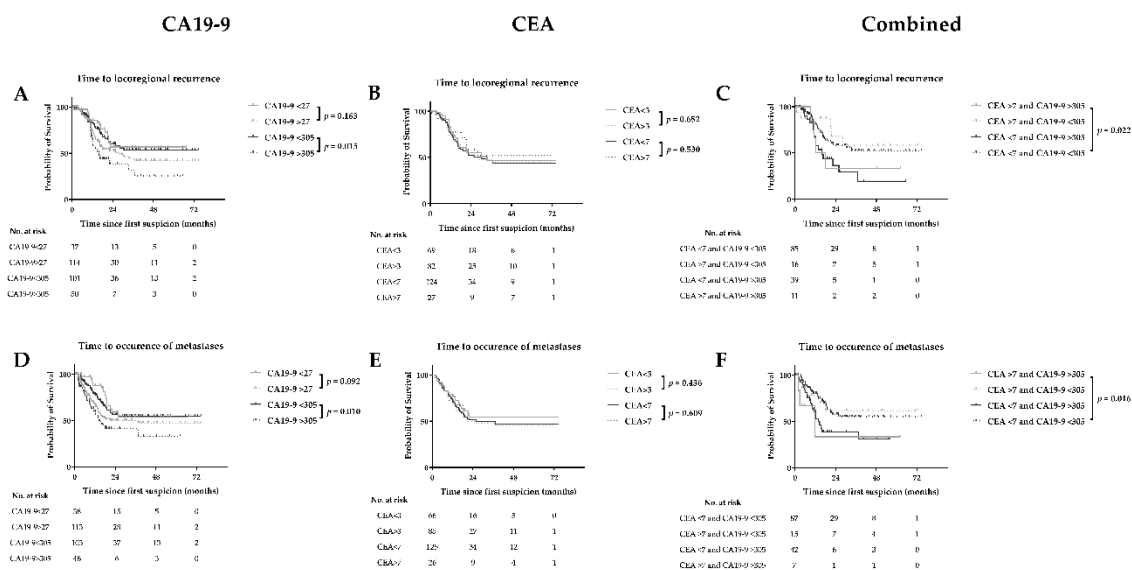

**Figure S2.** Recurrence patterns (locoregional (A–C) vs metastatic recurrence (D–F)) by CA19-9 and CEA serum levels.

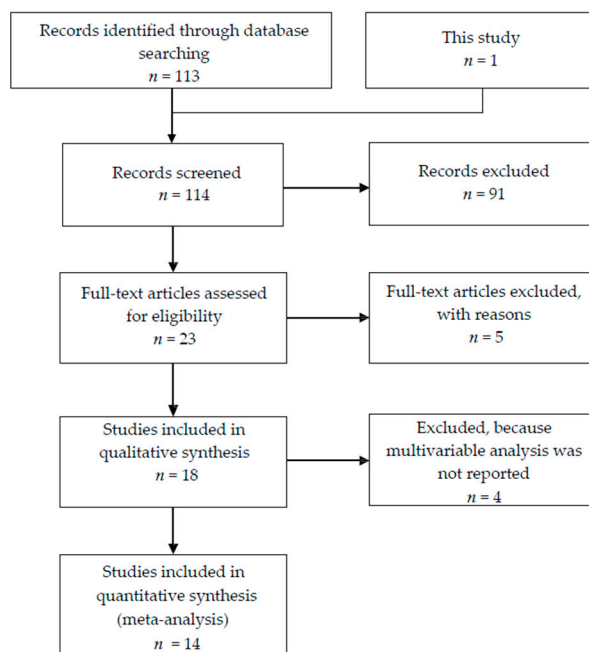

**Figure S3.** Flowchart of study selection.

**Table S3.** Studies that report on prognostic value of serum CA19-9 and CEA on overall survival in PDAC patients.

| Study                      | Country        | Study Population (No. of Patients)                   | Cut-off Level (CEA: $\mu\text{g/L}$ ; CA19-9: kU/L) | Fraction above Cut-off (%)   | Median OS (95% CI) below Cut-off (Months) | Median OS (95% CI) above Cut-off (Months) | Performance of Multivariable analysis |
|----------------------------|----------------|------------------------------------------------------|-----------------------------------------------------|------------------------------|-------------------------------------------|-------------------------------------------|---------------------------------------|
| CA19-9                     |                |                                                      |                                                     |                              |                                           |                                           |                                       |
| Ni et al., 2005 [1]        | China          | Resected and advanced PDAC ( $n = 105$ )             | 1,000                                               | 37.8                         | 9                                         | 6                                         | No                                    |
| Ferrone et al., 2006 [2]*  | United States  | Resected PDAC ( $n = 111$ )                          | 37<br>200<br>1000<br>2000                           | NR                           | 28<br>28<br>28<br>22                      | 19<br>14<br>12<br>13                      | No                                    |
| Smith et al., 2008 [3]     | United Kingdom | Resected PDAC ( $n = 109$ )                          | 150                                                 | 58.7                         | 22.1                                      | 10.4                                      | Yes                                   |
| Martin et al., 2012 [4] *  | United States  | Resected ( $n = 30$ ) and advanced ( $n = 93$ ) PDAC | 37                                                  | Resected: 50<br>Advanced: 72 | Resected: 36<br>Advanced: 32.3            | Resected: 20<br>Advanced: 11.3            | No                                    |
| Hartwig et al., 2013 [5] * | Germany        | Resected PDAC ( $n = 1543$ )                         | <5                                                  | 6.4                          | -                                         | 26.8                                      | No                                    |
|                            |                |                                                      | 5–37                                                | 18.2                         |                                           | 28.5                                      |                                       |
|                            |                |                                                      | 37–100                                              | 14.0                         |                                           | 26.9                                      |                                       |
|                            |                |                                                      | 100–250                                             | 16.0                         |                                           | 22.5                                      |                                       |
|                            |                |                                                      | 250–500                                             | 13.2                         |                                           | 20.1                                      |                                       |
|                            |                |                                                      | 500–1,000                                           | 11.9                         |                                           | 15.4                                      |                                       |
| 1000–2,000                 | 8.2            |                                                      | 12                                                  |                              |                                           |                                           |                                       |
| 2000–4,000                 | 6.0            |                                                      | 12.3                                                |                              |                                           |                                           |                                       |
| $\geq 4000$                | 6.1            |                                                      | 14.4                                                |                              |                                           |                                           |                                       |
| Lee et al., 2013 [6]       | Korea          | Resected PDAC ( $n = 187$ )                          | 376                                                 | 75.4                         | 12.4                                      | 13.5                                      | Yes                                   |
| Dong et al., 2014 [7]      | China          | Resected PDAC ( $n = 139$ )                          | 339                                                 | 43.3                         | 24.9                                      | 11.9                                      | Yes                                   |
| Reitz et al., 2015 [8]     | Austria        | Resected and advanced PDAC ( $n = 393$ )             | 931                                                 | 47.1                         | 10                                        | 5                                         | Yes                                   |
| Asaoka et al., 2016 [9]    | Japan          | Resected PDAC ( $n = 46$ )                           | 230                                                 | 30.4                         | NR                                        | 15.8                                      | Yes                                   |
| Imaoka et al., 2016 [10]   | Japan          | Resected PDAC ( $n = 119$ )                          | 37                                                  | 68.0                         | 55.9                                      | 44.9                                      | Yes                                   |
| Imaoka et al., 2016 [11]   | Japan          | Metastatic PDAC ( $n = 433$ )                        | 37                                                  | 84.8                         | 8.9                                       | 7.8                                       | Yes                                   |

|                                |                 |                                              |                         |              |            |            |     |
|--------------------------------|-----------------|----------------------------------------------|-------------------------|--------------|------------|------------|-----|
| Kondo et al., 2017 [12]        | Japan           | Resected PDAC ( <i>n</i> = 198)              | 300                     | 32.2         | 18.8       | 46.7       | Yes |
| Tingle et al., 2018 [13]       | United Kingdom  | Advanced PDAC ( <i>n</i> = 115)              | 770                     | NR           | 15.1       | 7.7        | Yes |
| Song et al., 2018 [14]         | China           | Metastatic PDAC ( <i>n</i> = 59)             | 626                     | 57.6         | NR         | NR         | Yes |
| This study                     | The Netherlands | Resected and advanced PDAC ( <i>n</i> = 375) | 305                     | 44.3         | 13         | 8          | Yes |
| <b>CEA</b>                     |                 |                                              |                         |              |            |            |     |
| Ni et al., 2005 [1]            | China           | Resected and advanced PDAC ( <i>n</i> = 105) | 5                       | 47.6         | 11         | 6          | No  |
| Lee et al., 2013 [6]           | Korea           | Resected PDAC ( <i>n</i> = 187)              | 5                       | 39.0         | 16.1       | 10.2       | Yes |
| Reitz et al., 2015 [8]         | Austria         | Resected and advanced PDAC ( <i>n</i> = 393) | 6.9                     | 33.6         | 10         | 4          | Yes |
| Asaoka et al., 2016 [9]        | Japan           | Resected PDAC ( <i>n</i> = 46)               | 4                       | 23.9         | NR         | NR         | Yes |
| Imaoka et al., 2016 [11]       | Japan           | Metastatic PDAC ( <i>n</i> = 433)            | 5<br>20                 | 57.3<br>30.3 | 10.3<br>NR | 6.8<br>6.1 | Yes |
| This study                     | The Netherlands | Resected and advanced PDAC ( <i>n</i> = 375) | 7                       | 32.3         | 13         | 7          | Yes |
| <b>CA19-9 and CEA combined</b> |                 |                                              |                         |              |            |            |     |
| Distler et al., 2013 [15]      | Germany         | Resected PDAC ( <i>n</i> = 259)              | 75 (CA19-9)<br>3 (CEA)  | 35.1         | 33.3       | 23.9       | Yes |
| This study                     | The Netherlands | Resected and advanced PDAC ( <i>n</i> = 375) | 305 (CA19-9)<br>7 (CEA) | 18.4         | 7          | 5          | Yes |

CA 19-9: cancer antigen 19-9, CEA: carcinoembryonic antigen, OS: overall survival, PDAC: pancreatic ductal adenocarcinoma, HR: Hazard Ratio, NR: not reported. \* Multiple cut-off values have been used.

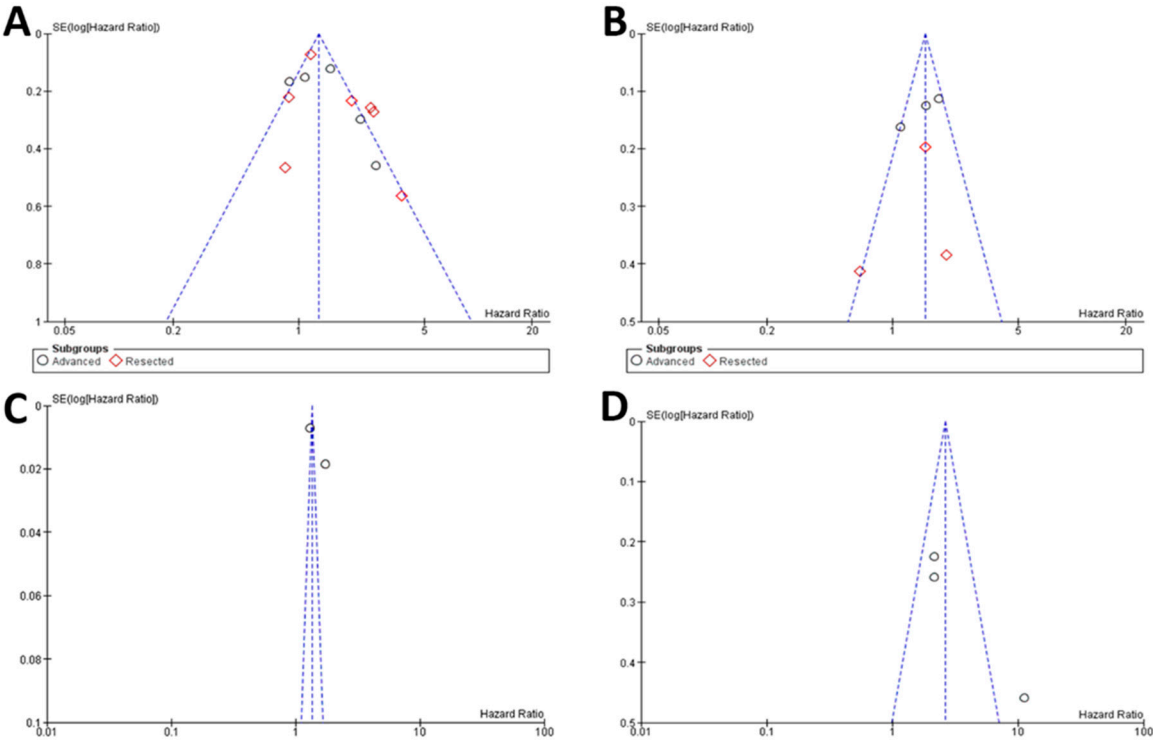

**Figure S4.** Funnel plots of included studies in meta-analysis, determining the prognostic value of CA19-9 on overall survival (A) CEA on overall survival (B) both CA19-9 and CEA on overall survival (C) and CA19-9 on recurrence (D) in PDAC patients.



**Table S4.** Forest plot of prognostic value of CA19-9 and CEA combined on overall survival in PDAC patients.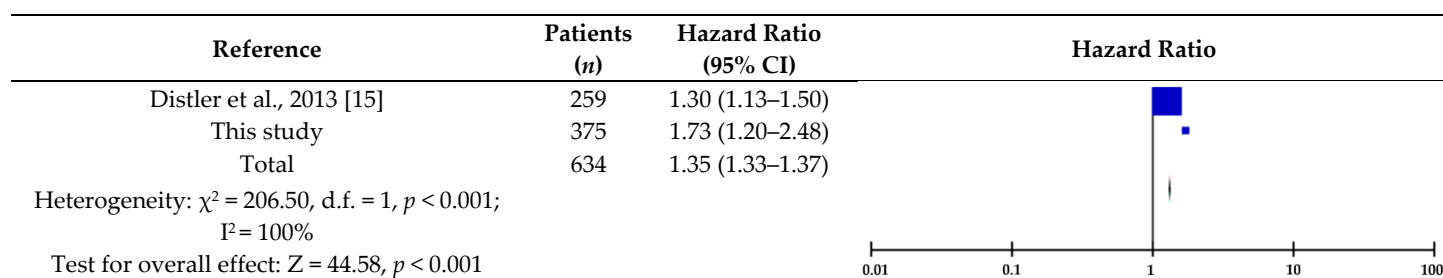

CA 19-9: cancer antigen 19-9; CEA: carcinoembryonic antigen; d.f.: degrees of freedom.

**Table S5.** Studies that report on prognostic value of preoperative serum CA19-9 and CEA for early recurrence in resected PDAC patients.

| Study                      | Country         | Marker | Study Population (No. of Patients) | Cut-off Level (CEA: $\mu\text{g/L}$ ; CA19-9: $\text{kU/L}$ ) | Fraction above Cut-off (%) | Median time-to-Recurrence (95% CI) below Cut-off (Months) | Median time-to-Recurrence (95% CI) above Cut-off (months) | Performance of Multivariable Analysis |
|----------------------------|-----------------|--------|------------------------------------|---------------------------------------------------------------|----------------------------|-----------------------------------------------------------|-----------------------------------------------------------|---------------------------------------|
| Waraya et al., 2009 [16]   | Japan           | CA19-9 | Resected PDAC ( $n = 117$ )        | 37                                                            | 56.4                       | 30.6                                                      | 12.7                                                      | Yes                                   |
| Sugiura et al., 2012 [17]  | Japan           | CA19-9 | Resected PDAC ( $n = 154$ )        | 100                                                           | 47.4                       | 22                                                        | 6                                                         | Yes                                   |
| Asaoka et al., 2016 [9] *  | Japan           | CA19-9 | Resected PDAC ( $n = 46$ )         | 230                                                           | 30.4                       | 12.7                                                      | 5.8                                                       | No                                    |
| Imaoka et al., 2016 [10] * | Japan           | CA19-9 | Resected PDAC ( $n = 119$ )        | 37                                                            | 68.0                       | 24.8                                                      | 17.9                                                      | No                                    |
| This study                 | The Netherlands | CA19-9 | Resected PDAC ( $n = 151$ )        | 27                                                            | 76.8                       | 22                                                        | 15                                                        | Yes                                   |
|                            |                 | CEA    | Resected PDAC ( $n = 151$ )        | 3                                                             | 53.0                       | 18                                                        | 15                                                        | No                                    |
|                            |                 |        |                                    | 7                                                             | 19.9                       | 21                                                        | 16                                                        |                                       |

CA 19-9: cancer antigen 19-9, CEA: carcinoembryonic antigen, PDAC: pancreatic ductal adenocarcinoma.

## References

- Ni, X.G.; Bai, X.F.; Mao, Y.L.; Shao, Y.F.; Wu, J.X.; Shan, Y.; Wang, C.F.; Wang, J.; Tian, Y.T.; Liu, Q.; et al. The clinical value of serum CEA, CA19-9, and CA242 in the diagnosis and prognosis of pancreatic cancer. *Eur. J. Surg. Oncol. J. Eur. Soc. Surg. Oncol. Br. Assoc. Surg. Oncol.* **2005**, *31*, 164–169, doi:10.1016/j.ejso.2004.09.007.
- Ferrone, C.R.; Finkelstein, D.M.; Thayer, S.P.; Muzikansky, A.; Fernandez-delCastillo, C.; Warshaw, A.L. Perioperative CA19-9 levels can predict stage and survival in patients with resectable pancreatic adenocarcinoma. *J. Clin. Oncol. Off. J. Am. Soc. Clin. Oncol.* **2006**, *24*, 2897–2902, doi:10.1200/jco.2005.05.3934.
- Smith, R.A.; Bosonnet, L.; Ghaneh, P.; Raraty, M.; Sutton, R.; Campbell, F.; Neoptolemos, J.P. Preoperative CA19-9 levels and lymph node ratio are independent predictors of survival in patients with resected pancreatic ductal adenocarcinoma. *Dig. Surg.* **2008**, *25*, 226–232, doi:10.1159/000140961.

4. Martin, L.K.; Wei, L.; Trolli, E.; Bekaii-Saab, T. Elevated baseline CA19-9 levels correlate with adverse prognosis in patients with early- or advanced-stage pancreas cancer. *Med. Oncol.* **2012**, *29*, 3101–3107, doi:10.1007/s12032-012-0278-9.
5. Hartwig, W.; Strobel, O.; Hinz, U.; Fritz, S.; Hackert, T.; Roth, C.; Buchler, M.W.; Werner, J. CA19-9 in potentially resectable pancreatic cancer: Perspective to adjust surgical and perioperative therapy. *Ann. Surg. Oncol.* **2013**, *20*, 2188–2196, doi:10.1245/s10434-012-2809-1.
6. Lee, K.J.; Yi, S.W.; Chung, M.J.; Park, S.W.; Song, S.Y.; Chung, J.B.; Park, J.Y. Serum CA 19-9 and CEA levels as a prognostic factor in pancreatic adenocarcinoma. *Yonsei Med. J.* **2013**, *54*, 643–649, doi:10.3349/ymj.2013.54.3.643.
7. Dong, Q.; Yang, X.H.; Zhang, Y.; Jing, W.; Zheng, L.Q.; Liu, Y.P.; Qu, X.J. Elevated serum CA19-9 level is a promising predictor for poor prognosis in patients with resectable pancreatic ductal adenocarcinoma: A pilot study. *World J. Surg. Oncol.* **2014**, *12*, 171, doi:10.1186/1477-7819-12-171.
8. Reitz, D.; Gerger, A.; Seidel, J.; Kornprat, P.; Samonigg, H.; Stotz, M.; Szkandera, J.; Pichler, M. Combination of tumour markers CEA and CA19-9 improves the prognostic prediction in patients with pancreatic cancer. *J. Clin. Pathol.* **2015**, *68*, 427–433, doi:10.1136/jclinpath-2014-202451.
9. Asaoka, T.; Miyamoto, A.; Maeda, S.; Tsujie, M.; Hama, N.; Yamamoto, K.; Miyake, M.; Haraguchi, N.; Nishikawa, K.; Hirao, M.; et al. Prognostic impact of preoperative NLR and CA19-9 in pancreatic cancer. *Pancreatol. Off. J. Int. Assoc. Pancreatol.* **2016**, *16*, 434–440, doi:10.1016/j.pan.2015.10.006.
10. Imaoka, H.; Shimizu, Y.; Senda, Y.; Natsume, S.; Mizuno, N.; Hara, K.; Hijioka, S.; Hieda, N.; Tajika, M.; Tanaka, T.; et al. Post-adjuvant chemotherapy CA19-9 levels predict prognosis in patients with pancreatic ductal adenocarcinoma: A retrospective cohort study. *Pancreatol. Off. J. Int. Assoc. Pancreatol. (Iap) ... [Et Al.]* **2016**, *16*, 658–664, doi:10.1016/j.pan.2016.04.007.
11. Imaoka, H.; Mizuno, N.; Hara, K.; Hijioka, S.; Tajika, M.; Tanaka, T.; Ishihara, M.; Hirayama, Y.; Hieda, N.; Yoshida, T.; et al. Prognostic impact of carcinoembryonic antigen (CEA) on patients with metastatic pancreatic cancer: A retrospective cohort study. *Pancreatol. Off. J. Int. Assoc. Pancreatol. (Iap) ... [Et Al.]* **2016**, *16*, 859–864, doi:10.1016/j.pan.2016.05.007.
12. Kondo, N.; Murakami, Y.; Uemura, K.; Nakagawa, N.; Takahashi, S.; Ohge, H.; Sueda, T. Comparison of the prognostic impact of pre- and post-operative CA19-9, SPan-1, and DUPAN-II levels in patients with pancreatic carcinoma. *Pancreatol. Off. J. Int. Assoc. Pancreatol.* **2017**, *17*, 95–102, doi:10.1016/j.pan.2016.10.004.
13. Tingle, S.J.; Severs, G.R.; Goodfellow, M.; Moir, J.A.; White, S.A. NARCA: A novel prognostic scoring system using neutrophil-albumin ratio and Ca19-9 to predict overall survival in palliative pancreatic cancer. *J. Surg. Oncol.* **2018**, *118*, 680–686, doi:10.1002/jso.25209.
14. Song, J.Y.; Chen, M.Q.; Guo, J.H.; Lian, S.F.; Xu, B.H. Combined pretreatment serum CA19-9 and neutrophil-to-lymphocyte ratio as a potential prognostic factor in metastatic pancreatic cancer patients. *Medicine* **2018**, *97*, e9707, doi:10.1097/md.00000000000009707.
15. Distler, M.; Pilarsky, E.; Kersting, S.; Grutzmann, R. Preoperative CEA and CA 19-9 are prognostic markers for survival after curative resection for ductal adenocarcinoma of the pancreas-A retrospective tumor marker prognostic study. *Int. J. Surg.* **2013**, *11*, 1067–1072, doi:10.1016/j.ijso.2013.10.005.
16. Waraya, M.; Yamashita, K.; Katagiri, H.; Ishii, K.; Takahashi, Y.; Furuta, K.; Watanabe, M. Preoperative serum CA19-9 and dissected peripancreatic tissue margin as determiners of long-term survival in pancreatic cancer. *Ann. Surg. Oncol.* **2009**, *16*, 1231–1240, doi:10.1245/s10434-009-0415-7.
17. Sugiura, T.; Uesaka, K.; Kanemoto, H.; Mizuno, T.; Sasaki, K.; Furukawa, H.; Matsunaga, K.; Maeda, A. Serum CA19-9 is a significant predictor among preoperative parameters for early recurrence after resection of pancreatic adenocarcinoma. *J. Gastrointest. Surg. Off. J. Soc. Surg. Aliment. Tract* **2012**, *16*, 977–985, doi:10.1007/s11605-012-1859-9.

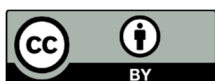

© 2020 by the authors. Licensee MDPI, Basel, Switzerland. This article is an open access article distributed under the terms and conditions of the Creative Commons Attribution (CC BY) license (<http://creativecommons.org/licenses/by/4.0/>).
